# Supplementary material
Source: Research Square preprint supplement (doi:10.21203/rs.3.rs-9197780/v1)
Supplement: Supplementary file 1 [file ea6fe819977b267bae7a42ef.docx]

**Table 1.** The summary of physico-chemical properties of investigated cyclopropylindole-based synthetic cannabinoid: UR-144, 5F-UR-144 (XLR-11) and XLR-12 based on PubChem.

| **Property** | **Cyclopropoylindole-based synthetic cannabinoids** | | |
| --- | --- | --- | --- |
| **Forensic acronym** | **UR-144** | **5F-UR-144, XLR-11** | **XLR-12** |
| IUPAC Name | (1-pentylindol-3-yl)-(2,2,3,3-tetramethylcyclopropyl)methanone | [1-(5-fluoropentyl)indol-3-yl]-(2,2,3,3-tetramethylcyclopropyl)methanone | (2,2,3,3-tetramethylcyclopropyl)-[1-(4,4,4-trifluorobutyl)indol-3-yl]methanone |
| Synonyms | (1-pentyl-1H-indol-3-yl)(2,2,3,3-tetramethylcyclopropyl)-methanone;  KM-X1;  1199943-44-6 | (1-(5-fluoropentyl)indol-3-yl)-(2,2,3,3-tetramethylcyclopropyl)methanone;  XLR11; 1364933-54-9 | [(2,2,3,3-tetramethylcyclopropyl)-[1-(4,4,4-trifluorobutyl)indol-3-yl]methanone](https://www.ncbi.nlm.nih.gov/pcsubstance/?term=%22(2%2C2%2C3%2C3-tetramethylcyclopropyl)-%5B1-(4%2C4%2C4-trifluorobutyl)indol-3-yl%5Dmethanone%22%5bCompleteSynonym%5d%20AND%2011559386%5bStandardizedCID%5d);  [XLR12](https://www.ncbi.nlm.nih.gov/pcsubstance/?term=%22Xlr-12%22%5bCompleteSynonym%5d%20AND%2011559386%5bStandardizedCID%5d);  [895155-78-9](https://www.ncbi.nlm.nih.gov/pcsubstance/?term=%22895155-78-9%22%5bCompleteSynonym%5d%20AND%2011559386%5bStandardizedCID%5d) |
| CAS number | 1199943-44-6 | [1364933-54-9](https://commonchemistry.cas.org/detail?cas_rn=1364933-54-9) | [895155-78-9](https://commonchemistry.cas.org/detail?cas_rn=895155-78-9) |
| SMILES (canonical) | CCCCCN1C2=CC=CC=C2C (C(C3C(C)(C)C3(C)C)=O)=C1 | CC1(C(C1(C)C)C(=O)C2=CN (C3=CC=CC=C32)CCCCCF)C | CC1(C(C1(C)C)C(=O)C2=CN (C3=CC=CC=C32)CCCC(F)(F)F)C |
| Molecular formula | C21H29NO | [C21H28FNO](https://pubchem.ncbi.nlm.nih.gov/#query=C21H28FNO) | C20H24F3NO |
| Chemical structure | 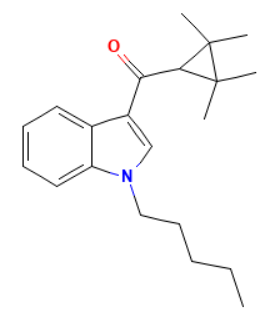 | 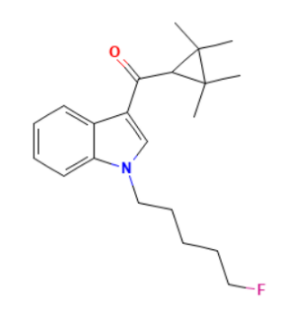 | 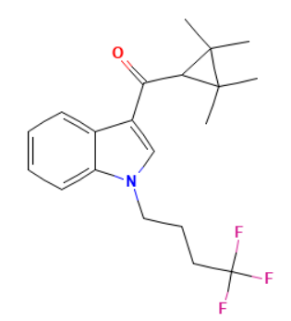 |
| Molar mass, g/mol | 311.5 g/mol | 329.5 g/mol | 351.4 g/mol |

**Table 2.** Qualitative prediction of acute toxicity for UR-144, 5F-UR-144 (XLR-11) and XLR-12 using *in silico* software: StopTox and admetSAR.

| **Type of toxicity** | **UR-144** | | | | | |
| --- | --- | --- | --- | --- | --- | --- |
| **STopTox** | | | | **admetSAR3.0** | **Admetlab 3.0**  **3.0** |
| **Prediction** | **Confidence (%)** | **Applicability domain** | **Predicted toxicophore(s)** | **Probability  (%)** | **Probability  (%)** |
| **Acute**   **oral toxicity** | Toxic (+) | 75 | 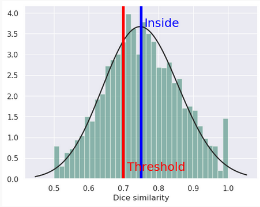 | 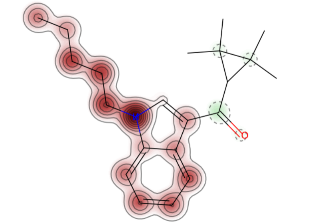 | 17.6 | 34.3 |
| **Acute dermal toxicity** | Non-Toxic  (-) | 72 | 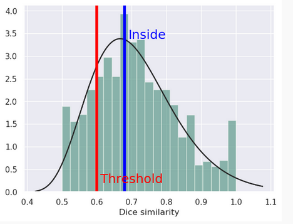 | 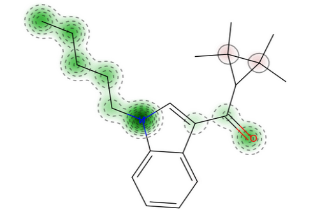 | 48.8 | NA |
| **Acute inhalation toxicity** | Toxic (+) | 71 | 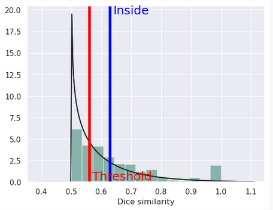 | 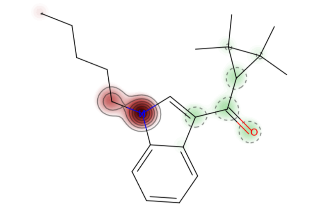 | NA | NA |
| **Type of toxicity** | **5F-UR-144 (XLR-11)** | | | | | |
| **STopTox** | | | | **admetSAR 3.0** | **Admetlab 3.0 3.0** |
| **Prediction** | **Confidence (%)** | **Applicability domain** | **Predicted toxicophore(s)** | **Probability  (%)** | **Probability  (%)** |
| **Acute**   **oral toxicity** | Toxic (+) | 72 % | 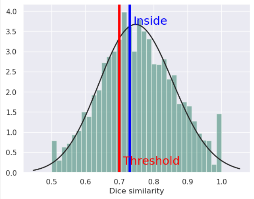 | 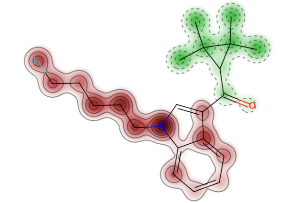 | 78.3 | 79.5 |
| **Acute dermal toxicity** | Non-Toxic (-) | 66 % | 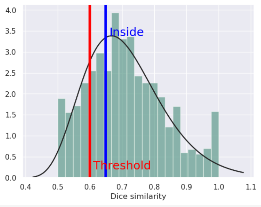 | 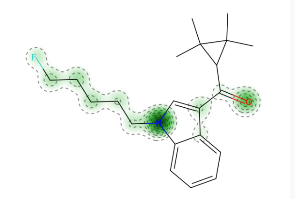 | 80 | NA |
| **Acute inhalation toxicity** | Toxic (+) | 66 % | 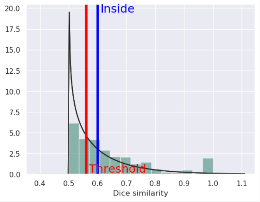 | 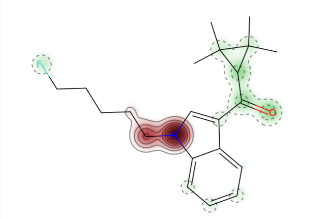 | NA | NA |
| **Type of toxicity** | **XLR-12** | | | | | |
| **STopTox** | | | | **admetSAR** | **Admetlab 3.0** |
| **Prediction** | **Confidence (%)** | **Applicability domain** | **Predicted toxicophore(s)** | **Probability  (%)** | **Probability  (%)** |
| **Acute**   **oral toxicity** | Toxic (+) | 69 % | 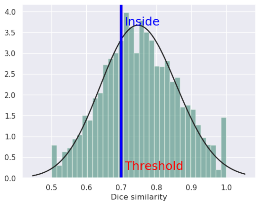 | 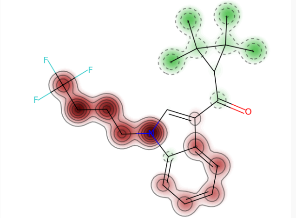 | 75.3 | 24.5 % |
| **Acute dermal toxicity** | Non-Toxic (-) | 56 % | 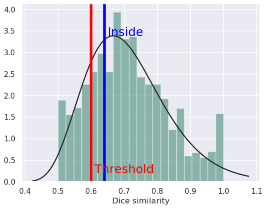 | 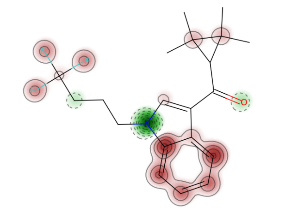 | 74.3 | NA |
| **Acute inhalation toxicity** | Toxic (+) | 65 % | 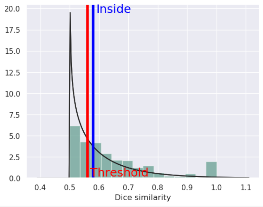 | 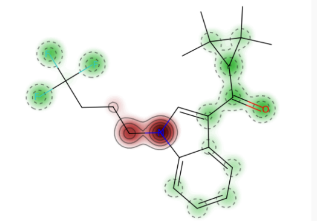 | NA | NA |

NA – Not applicable

**Table 4.** Predicted health effects for investigated cyclopropylindole-based synthetic cannabinoids: UR-144, 5F-UR-144 (XLR-11) and XLR-12 using Percepta software.

| UR-144 | | | 5F-UR-144 (XLR-11) | | XLR-12 | |
| --- | --- | --- | --- | --- | --- | --- |
| Health effect | Probability od health effect [%] | Toxicophore(s) | Probability od health effect [%] | Toxicophore(s) | Probability od health effect [%] | Toxicophore(s) |
| Lungs | 89 | 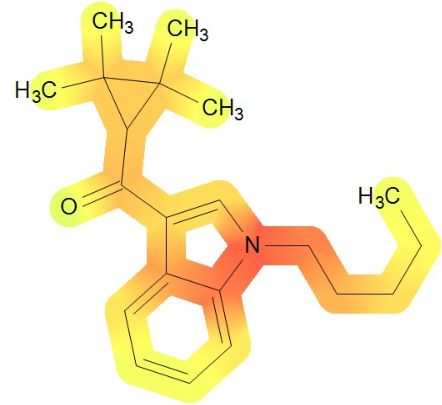 | 89 | 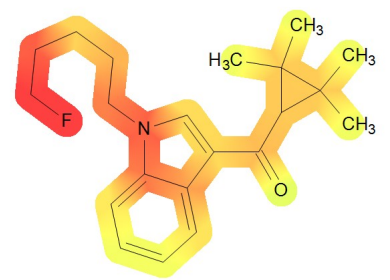 | 80 | 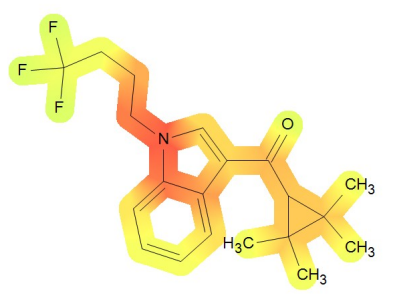 |
| Blood | 82 | 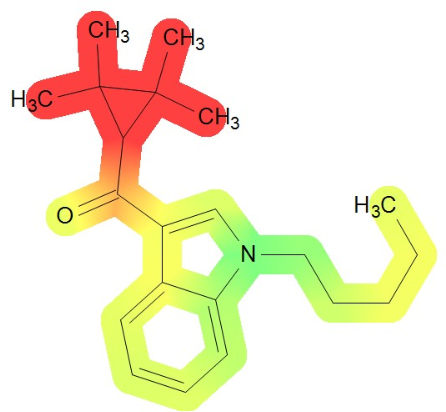 | 84 | 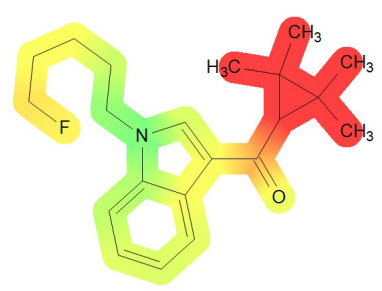 | 86 | 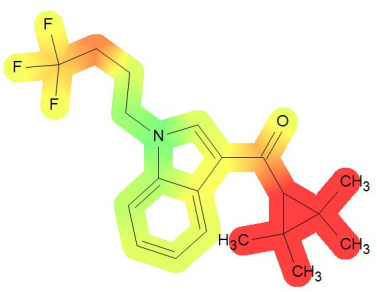 |
| Kidney | 70 | 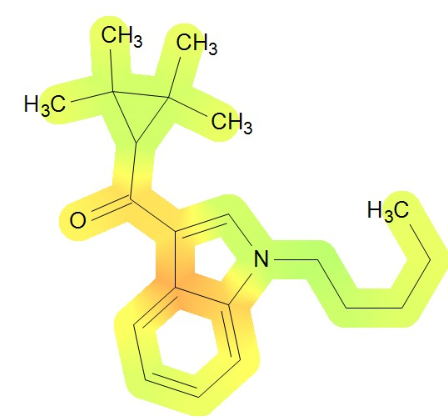 | 73 | 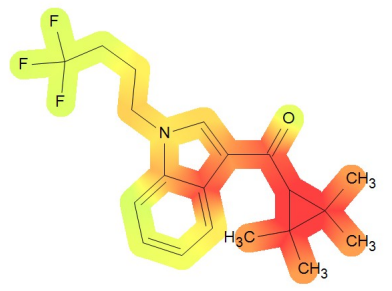 | 76 | 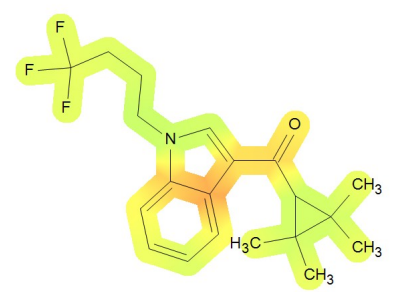 |
| Cardiovascular system | 59 | 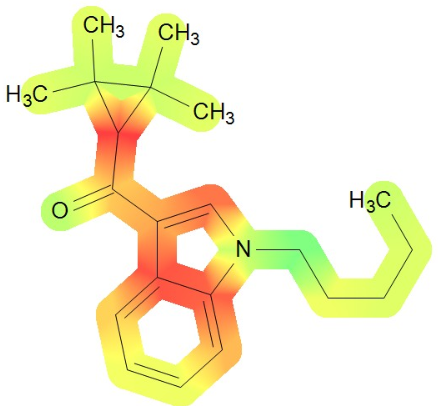 | 70 | 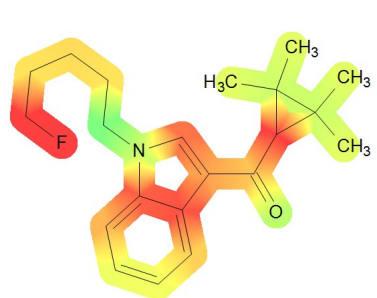 | 72 | 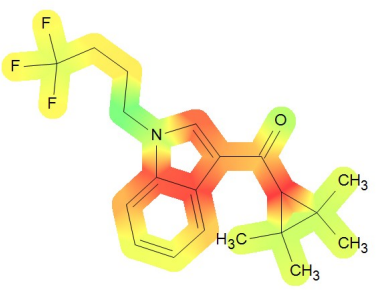 |
| Gastrointestinal system | 27 | 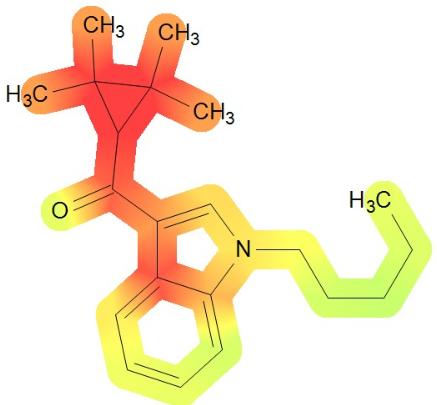 | 19 | 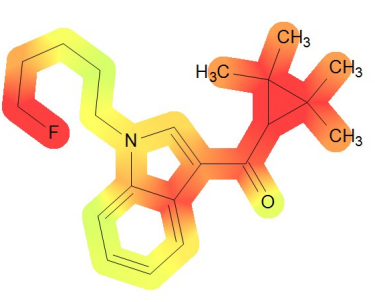 | 14 | 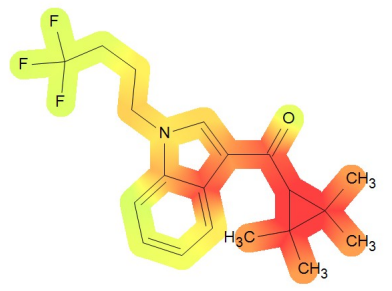 |
| Liver | 24 | 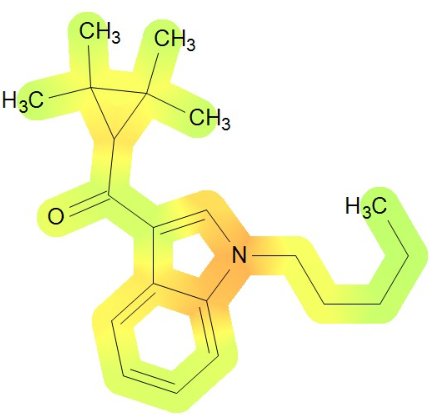 | 25 | 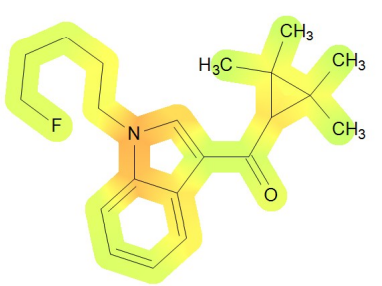 | 32 | 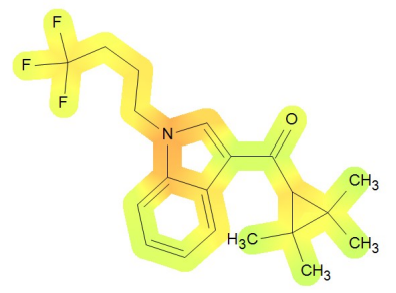 |

**Table 6.** Results of eye irritation prediction for investigated cyclopropylindole-based synthetic cannabinoids: UR-144, 5F-UR-144 (XLR-11) and XLR-12 received with various *in silico* methods.

| *In silico* method | UR-144 | 5F-UR-144 (XLR-11) | XLR-12 |
| --- | --- | --- | --- |
| StopTox | Non-toxic (-) | Non-toxic (-) | Non-toxic (-) |
| Probability 58% | Probability 59% | Probability 50% |
| 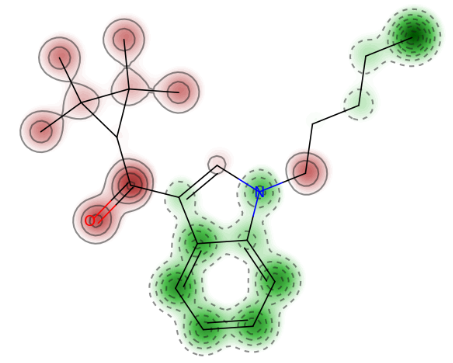 | 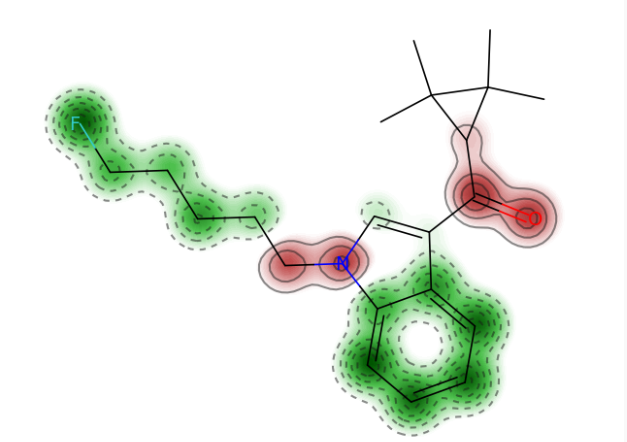 | 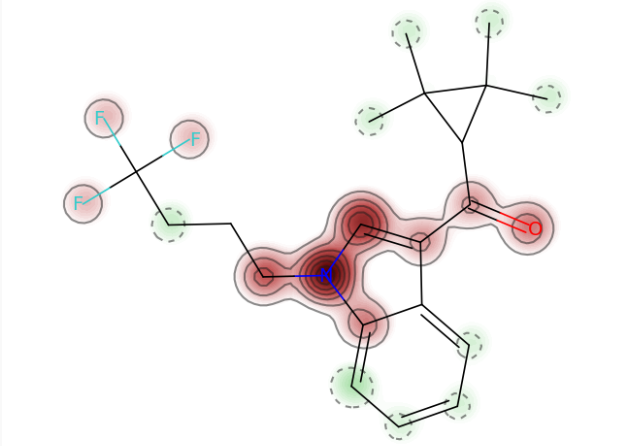 |
| 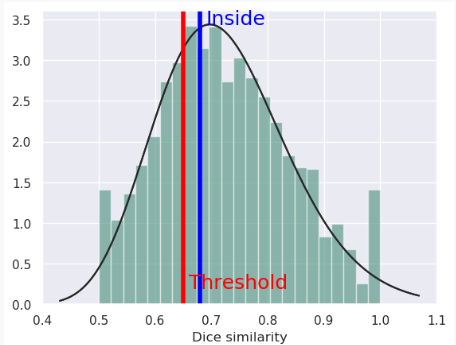 | 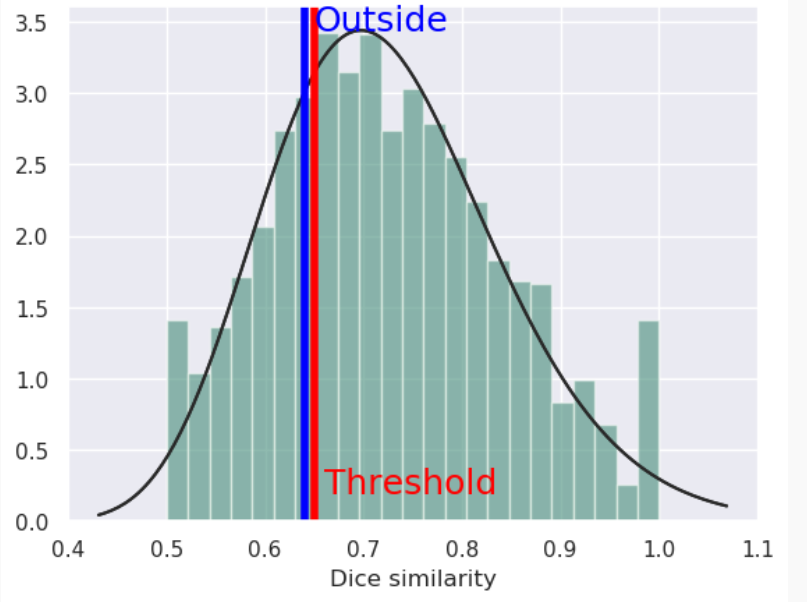 | 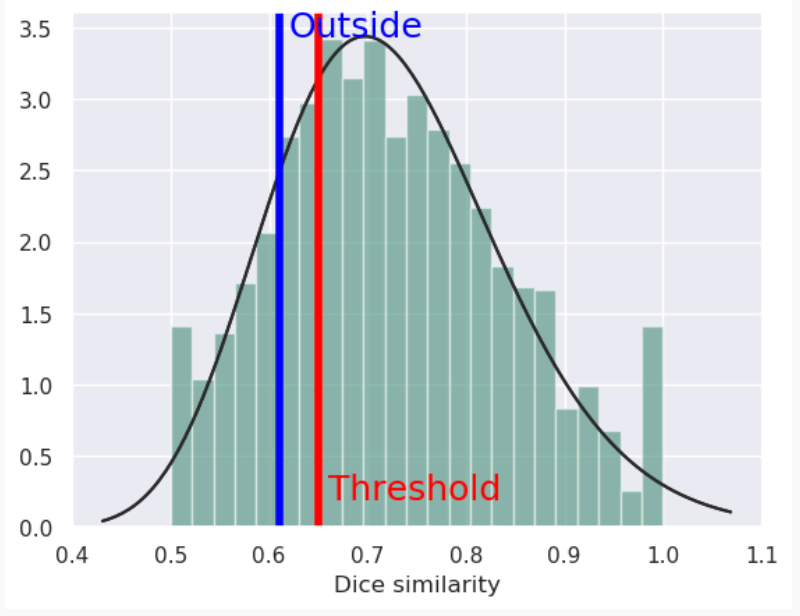 |
| Admetlab 3.0 3.0 | 78.2% (probability of being irritation) | 58% ((probability of being irritation) | 44.1% (probability of being irritation) |
| admetSAR 3.0 | 88.3% (probability of being irritation) | 42.1% (probability of being irritation) | 49.9% (probability of being irritation) |
| Percepta 2023.1.2 | Probability – 19% | Probability – 19% | Probability – 20% |
| Vega QSAR 1.2.3  (Eye irritation (CONCERT/Kode) 1.0.0) | Not-irritation, but the predicted compound is outside the AD of the model | Irritation, but the predicted compound is outside the AD of the model | Not irritation, but the predicted compound could be out of the AD of the model |

AD – applicability domain

**Table 7.** Results of skin irritation prediction for investigated cyclopropylindole-based synthetic cannabinoids: UR-144, 5F-UR-144 (XLR-11) and XLR-12 received with various *in silico* methods.

| *In silico* method | UR-144 | 5F-UR-144 (XLR-11) | XLR-12 |
| --- | --- | --- | --- |
| StopTox | Negative (-) | Negative (-) | Negative (-) |
| Probability 60% | Probability 60% | Probability 70% |
| 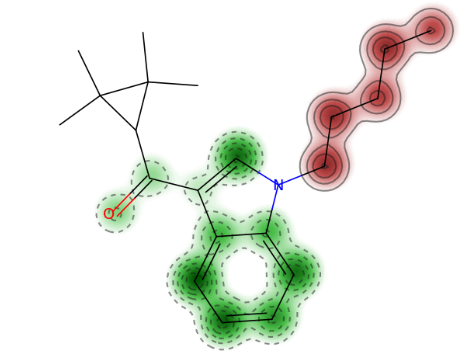 | 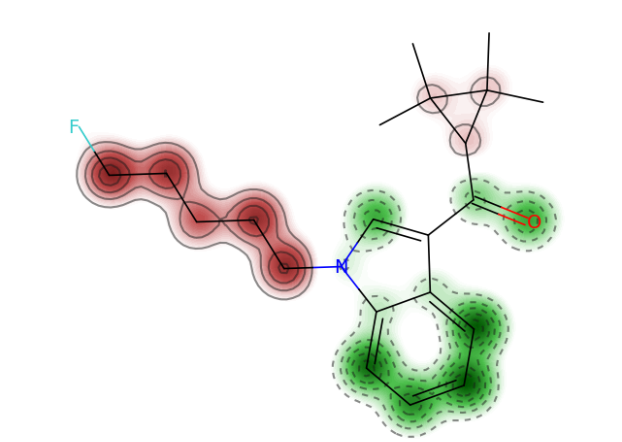 | 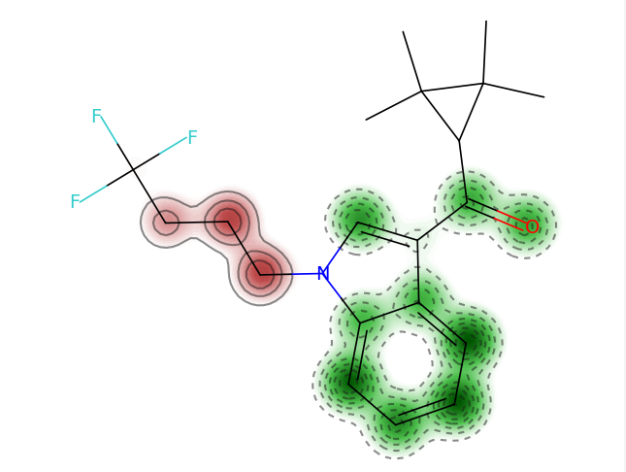 |
| 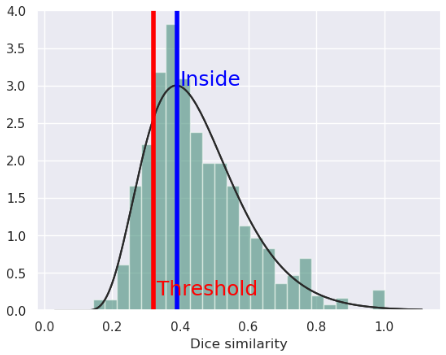 | 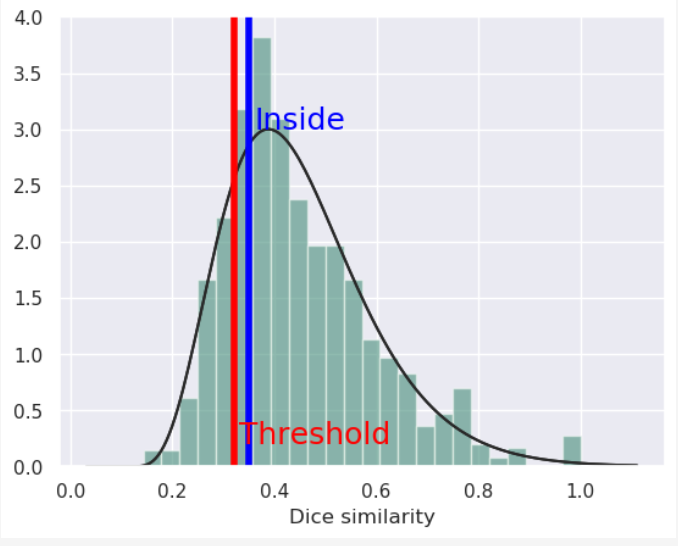 | 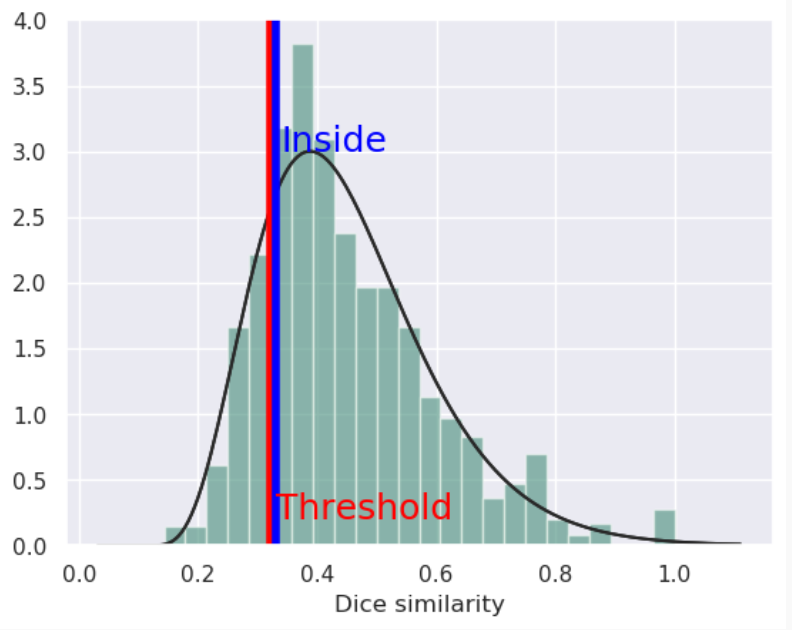 |
| Admetlab 3.0 3.0 | NA | NA | NA |
| admetSAR 3.0 | 34.1% (probability of being irritation) | 15.7% (probability of being irritation) | 12.9% (probability of being irritation) |
| Percepta 2023.1.2 | Probability – 28 % | Probability – 28 % | Probability – 29 % |
| Vega QSAR 1.2.3  Skin irritation (CONCERT/Kode) 1.0.0 | Not-Sensitizer, but the predicted compound is outside the AD of the model | Active, but the predicted compound is outside the AD of the model | Active, but the predicted compound is outside the AD of the model |

NA – Not applicable
